# Supplementary material for: Ag-catalyzed diastereoselective [6 + 3] cycloaddition of tropone with homoserine lactone-derived azomethine ylides: synthesis of tricyclic spiropiperidines
Source: Royal Society of Chemistry journal article supplement (doi:10.1039/c6ra14018a), 2016-01-01
Supplement: c6ra14018a1.pdf [file c6ra14018a1.pdf]

## Supporting Information

### Ag-Catalyzed Diastereoselective [6+3] Cycloaddition of Tropone with Homoserine Lactone-Derived Azomethine Ylides: Synthesis of Tricyclic Spiropiperidines

Yang Wu, Honglei Liu, Lei Zhang, Zhanhu Sun, Yumei Xiao, Jiaying Huang,\* Min Wang\* and  
Hongchao Guo\*

#### Contents

|                                                                       |         |
|-----------------------------------------------------------------------|---------|
| General Information                                                   | S2      |
| Preparation of $\alpha$ -Iminoesters <b>2</b>                         | S2      |
| General Procedure for [6+3] Cycloaddition                             | S2      |
| Characterization Data for the [6+3] Cycloaddition Products <b>3</b>   | S3-S8   |
| $^1\text{H}$ and $^{13}\text{C}$ NMR Spectra of the Products <b>3</b> | S9-S19  |
| X-Ray Crystallographic Data of <b>3a</b>                              | S20-S26 |

## General Information

All reactions were performed under N<sub>2</sub> atmospheres in oven-dried glassware with magnetic stirring. Unless otherwise stated, all reagents were purchased from commercial suppliers and used without further purification. Diethyl ether employed in the reactions was freshly distilled from CaCl<sub>2</sub>. Organic solutions were concentrated under reduced pressure on a rotary evaporator or an oil pump. Reactions were monitored through thin layer chromatography (TLC) on silica gel–precoated glass plates. Flash column chromatography was performed using Qingdao Haiyang flash silica gel (200–300 mesh). Infrared spectra were recorded using a Bruker Optics TENSOR 27 instrument. <sup>1</sup>H and <sup>13</sup>C NMR spectra were recorded in CDCl<sub>3</sub> using a 300 MHz NMR instrument (referenced internally to Me<sub>4</sub>Si). Chemical shifts (δ, ppm) are relative to tetramethylsilane (TMS) with the resonance of the non-deuterated solvent or TMS as the internal standard. <sup>1</sup>H NMR data are reported as follows: chemical shift, multiplicity (s = singlet; d = doublet; q = quartet; m = multiplet; br = broad), coupling constant (Hz), and integral. Data for <sup>13</sup>C NMR spectra are reported in terms of chemical shift. Optical rotation was obtained on an Autopol V Plus polarimeter. Accurate mass measurements were performed using an Agilent instrument with the ESI-MS technique.

## Preparation of α-Iminoesters 2

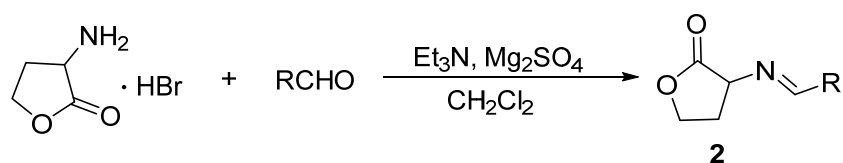

All α-iminoesters were prepared using the reported procedure. A suspension of α-amino-γ-butyrolactone hydrobromide (14.8 mmol), MgSO<sub>4</sub> (14.8 mmol) and Et<sub>3</sub>N (14.8 mmol) in dry CH<sub>2</sub>Cl<sub>2</sub> (36 mL) was stirred at room temperature for 1 h, and aldehyde (16.2 mmol) was added. The resulting mixture was stirred at room temperature for 12 h, and then was filtered. To the filtrate was added water (5 mL). The organic layer was separated and the aqueous phase was extracted with CH<sub>2</sub>Cl<sub>2</sub> (10 mL). The combined organic layers were washed with brine, dried over MgSO<sub>4</sub> and evaporated under reduced pressure to afford α-iminoesters **2**, which was used in the next step without further purification.

## General Procedure for [6+3] cycloaddition between Troponone and Azomethine Ylides by AgOAc/PPh<sub>3</sub>

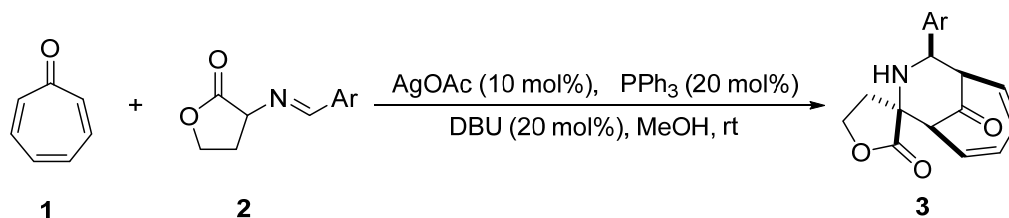

Under nitrogen atmosphere, Ag catalyst (10 mol%, 0.03 mmol, 5.0 mg) and Ph<sub>3</sub>P (20 mol%, 0.06 mmol, 15.8 mg) were dissolved in 1 mL of methanol. The resulting mixture was stirred at room temperature for about 1 hour, followed by addition of troponone **1** (0.3 mmol, 30 μL), α-iminoesters **2** (0.45 mmol), DBU (20 mol%, 9.1 mg, 0.06 mmol) and methanol (2 mL). Upon the completion of the reaction as monitored by TLC, the mixture was concentrated in vacuo. The residue was purified through flash column chromatography (EtOAc/petroleum ether) to afford the corresponding product.

### Characterization Data for the Cycloaddition Products 3

#### 9-Phenyl-4',5'-dihydro-2'H-8-azaspiro[bicyclo[4.3.1]deca[2,4]diene-7,3'-furan]-2',10-dione (3a)

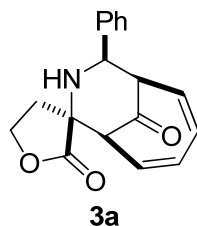

Prepared according to the general procedure as described above in 92% yield. Reaction time = 12 h. It was purified by flash chromatography ( EtOAc/PE = 1/10 ) to afford white solid, m.p. 102 – 103 °C. <sup>1</sup>H NMR analysis: >20:1 dr. <sup>1</sup>H NMR (300 MHz, CDCl<sub>3</sub>) δ 7.39 – 7.18 (m, 5H), 6.16 (dd, *J* = 11.4, 7.7 Hz, 1H), 6.06 – 5.87 (m, 1H), 5.59 (dd, *J* = 11.1, 8.2 Hz, 1H), 5.09 (dd, *J* = 11.3, 7.7 Hz, 1H), 4.83 (dd, *J* = 11.1, 3.8 Hz, 1H), 4.54 (ddd, *J* = 10.8, 8.8, 5.6 Hz, 1H), 4.39 (m, 1H), 3.73 (ddd, *J* = 7.7, 4.0, 2.4 Hz, 1H), 3.37 (dd, *J* = 8.2, 2.4 Hz, 1H), 2.43 (ddd, *J* = 13.3, 10.8, 8.5 Hz, 1H), 2.10 (ddd, *J* = 13.3, 5.6, 1.1 Hz, 1H), 1.97 (d, *J* = 11.2 Hz, 1H); <sup>13</sup>C NMR (75 MHz, CDCl<sub>3</sub>) δ 203.1, 175.3, 138.0, 128.5, 128.0, 127.5, 126.2, 125.9, 124.1, 121.0, 67.2, 66.14, 60.4, 58.4, 56.0, 35.7; IR (film)  $\nu_{\max}$  3323, 3030, 2980, 2929, 1750, 1603, 1480, 1379, 1264, 1193, 1062, 1031, 957, 873, 827, 802, 751, 661, 614, 512, 468; HRMS (ESI) calcd for C<sub>18</sub>H<sub>17</sub>NO<sub>3</sub> [M + Na]<sup>+</sup> 318.1101, found 318.1100.

#### 9-(*o*-Tolyl)-4',5'-dihydro-2'H-8-azaspiro[bicyclo[4.3.1]deca[2,4]diene-7,3'-furan]-2',10-dione (3b)

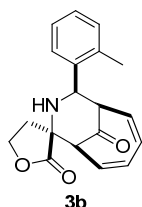

Prepared according to the general procedure as described above in 56% yield. Reaction time = 12 h. It was purified by flash chromatography ( EtOAc/PE = 1/10 ) to afford white solid, m.p. 114 – 115 °C. <sup>1</sup>H NMR analysis: >20:1 dr. <sup>1</sup>H NMR (300 MHz, CDCl<sub>3</sub>) δ 7.24 – 7.16 (m, 3H), 7.05 – 6.98 (m, 1H), 6.21 (dd, *J* = 11.3, 7.6 Hz, 1H), 6.08 (dd, *J* = 11.4, 7.7 Hz, 1H), 5.63 (dd, *J* = 11.3, 8.2 Hz, 1H), 5.05 (dd, *J* = 11.5, 7.8 Hz, 2H), 4.51 (m, 1H), 4.43 – 4.34 (m, 1H), 3.71 – 3.54 (m, 1H), 3.39 (dd, *J* = 8.2, 2.4 Hz, 1H), 2.50 – 2.42 (m, 1H), 2.38 (s, 3H), 2.15 – 2.02 (m, 2H); <sup>13</sup>C NMR (75 MHz, CDCl<sub>3</sub>) δ 203.3, 175.5, 135.8, 135.0, 130.9, 128.2, 127.3, 126.0, 125.9, 125.5, 124.2, 120.9, 67.1, 66.0, 56.7, 56.2, 56.0, 35.5, 29.6; IR (film)  $\nu_{\max}$  3330, 3052, 2935, 1741, 1606, 1587, 1377, 1264, 1200, 1122, 1095, 1028, 876, 827, 775, 762, 696, 484; HRMS (ESI) calcd for C<sub>19</sub>H<sub>19</sub>NO<sub>3</sub> [M + Na]<sup>+</sup> 332.1257, found 332.1256.

**9-(m-Tolyl)-4',5'-dihydro-2'H-8-azaspiro[bicyclo[4.3.1]deca[2,4]diene-7,3'-furan]-2',10-dione (3c)**

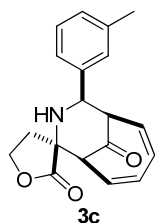

Prepared according to the general procedure as described above in 74% yield. Reaction time = 12 h. It was purified by flash chromatography ( EtOAc/PE = 1/10 ) to afford white solid, m.p. 120 – 121 °C. <sup>1</sup>H NMR analysis: >20:1 dr. <sup>1</sup>H NMR (300 MHz, CDCl<sub>3</sub>) δ 7.23 (t, *J* = 7.5 Hz, 1H), 7.04 (dd, *J* = 23.9, 7.9 Hz, 3H), 6.15 (m, 1H), 6.04 – 5.93 (m, 1H), 5.59 (dd, *J* = 11.4, 8.2 Hz, 1H), 5.11 (dd, *J* = 11.5, 7.7 Hz, 1H), 4.78 (dd, *J* = 11.2, 3.7 Hz, 1H), 4.61 – 4.49 (m, 1H), 4.38 (m 1H), 3.71 (ddd, *J* = 7.1, 3.9, 2.4 Hz, 1H), 3.34 (m, 1H), 2.42 (m, 1H), 2.35 (s, 3H), 2.11 (ddd, *J* = 13.3, 5.5, 1.0 Hz, 1H), 1.97 (d, *J* = 11.7 Hz, 1H); <sup>13</sup>C NMR (75 MHz, CDCl<sub>3</sub>) δ 203.3, 175.4, 138.1, 138.0, 128.3, 128.2, 128.0, 127.0, 125.8, 124.1, 123.3, 120.9, 67.3, 66.2, 60.4, 58.4, 56.0, 35.6, 21.5; IR (film)  $\nu_{\max}$  3295, 3044, 2912, 1785, 1623, 1499, 1400, 1325, 1277, 1208, 1093, 1041, 890, 845, 762, 700, 464; HRMS (ESI) calcd for C<sub>19</sub>H<sub>19</sub>NO<sub>3</sub> [M + Na]<sup>+</sup> 332.1257, found 332.1261.

**9-(p-Tolyl)-4',5'-dihydro-2'H-8-azaspiro[bicyclo[4.3.1]deca[2,4]diene-7,3'-furan]-2',10-dione (3d)**

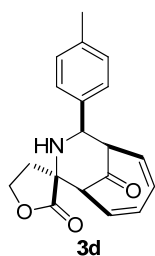

Prepared according to the general procedure as described above in 76% yield. Reaction time = 12 h. It was purified by flash chromatography ( EtOAc/PE = 1/10 ) to afford white solid, m.p. 104 – 105 °C. <sup>1</sup>H NMR analysis: >20:1 dr. <sup>1</sup>H NMR (300 MHz, CDCl<sub>3</sub>) δ 7.12 (q, *J* = 8.2 Hz, 4H), 6.15 (dd, *J* = 11.4, 7.7 Hz, 1H), 6.07 – 5.92 (m, 1H), 5.58 (dd, *J* = 11.3, 8.2 Hz, 1H), 5.13 (m, 1H), 4.78 (d, *J* = 5.6 Hz, 1H), 4.63 – 4.47 (m, 1H), 4.43 – 4.31 (m, 1H), 3.69 (ddd, *J* = 12.1, 7.3, 5.3 Hz, 1H), 3.35 (dd, *J* = 8.2, 2.3 Hz, 1H), 2.49 – 2.36 (m, 1H), 2.34 (s, 3H), 2.09 (ddd, *J* = 13.3, 5.5, 1.0 Hz, 1H), 1.95 (d, *J* = 10.5 Hz, 1H); <sup>13</sup>C NMR (75 MHz, CDCl<sub>3</sub>) δ 203.4, 175.4, 137.2, 135.0, 129.1, 128.0, 126.1, 125.8, 124.1, 120.9, 67.3, 66.2, 60.3, 58.5, 56.0, 35.6, 21.0; IR (film)  $\nu_{\max}$  3375, 3030, 2900, 2853, 1740, 1583, 1520, 1464, 1270, 1219, 1192, 1095, 1028, , 819, 780, 715, 660, 483; HRMS (ESI) calcd for C<sub>19</sub>H<sub>19</sub>NO<sub>3</sub> [M + Na]<sup>+</sup> 332.1257, found 332.1258.

**9-(3-Methoxyphenyl)-4',5'-dihydro-2'H-8-azaspiro[bicyclo[4.3.1]deca[2,4]diene-7,3'-furan]-2',10-dione (3e)**

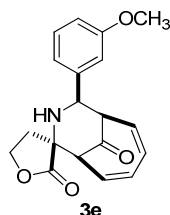

Prepared according to the general procedure as described above in 68% yield. Reaction time = 12 h. It was purified by flash chromatography ( EtOAc/PE = 1/10 ) to afford yellow semi-solid. <sup>1</sup>H NMR analysis: >20:1 dr. <sup>1</sup>H NMR (300 MHz, CDCl<sub>3</sub>) δ 7.26 (dd, *J* = 9.2, 6.6 Hz, 1H), 6.85 – 6.73 (m, 3H), 6.14 (dd, *J* = 11.4, 7.7 Hz, 1H), 5.99 (dd, *J* = 11.5, 7.7 Hz, 1H), 5.58 (dd, *J* = 11.4, 8.2 Hz, 1H), 5.12 (dd, *J* = 11.5, 7.7 Hz, 1H), 4.78 (dd, *J* = 11.5, 3.8 Hz, 1H), 4.53 (ddd, *J* = 10.8, 8.8, 5.6 Hz, 1H), 4.38 (m, 1H), 3.80 (s, 3H), 3.71 (ddd, *J* = 6.5, 3.8, 2.4 Hz, 1H), 3.35 (dd, *J* = 8.2, 2.3 Hz, 1H), 2.42 (ddd, *J* = 13.3, 10.8, 8.5 Hz, 1H), 2.13 – 2.03 (m, 1H), 1.95 (d, *J* = 11.7 Hz, 1H); <sup>13</sup>C NMR (75 MHz, CDCl<sub>3</sub>) δ 203.2, 175.4, 159.7, 139.7, 129.5, 128.0, 125.9, 123.9, 120.9, 118.5, 112.5, 112.4, 67.2, 66.2, 60.3, 58.3, 56.0, 55.3, 35.6; IR (film)  $\nu_{\max}$  3425, 3000, 2923, 2873, 1720, 1705, 1612, 1464, 1435, 1264, 1220, 1144, 1087, 1049, 785; HRMS (ESI) calcd for C<sub>19</sub>H<sub>19</sub>NO<sub>4</sub> [M + Na]<sup>+</sup> 348.1206, found 348.1201.

**9-(4-Methoxyphenyl)-4',5'-dihydro-2'H-8-azaspiro[bicyclo[4.3.1]deca[2,4]diene-7,3'-furan]-2',10-dione (3f)**

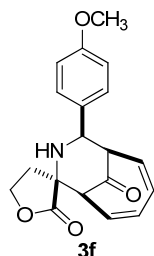

Prepared according to the general procedure as described above in 52% yield. Reaction time = 16 h. It was purified by flash chromatography ( EtOAc/PE = 1/10 ) to afford yellow semi-solid. <sup>1</sup>H NMR analysis: >20:1 dr. <sup>1</sup>H NMR (300 MHz, CDCl<sub>3</sub>) δ 7.13 (t, *J* = 5.7 Hz, 2H), 6.91 – 6.82 (m, 2H), 6.15 (dd, *J* = 11.4, 7.7 Hz, 1H), 6.00 (dd, *J* = 11.5, 7.7 Hz, 1H), 5.58 (dd, *J* = 11.4, 8.2 Hz, 1H), 5.17 – 5.08 (m, 1H), 4.80 – 4.71 (m, 1H), 4.53 (ddd, *J* = 10.8, 8.8, 5.6 Hz, 1H), 4.37 (m, 1H), 3.80 (s, 3H), 3.70 – 3.64 (m, 1H), 3.35 (dd, *J* = 8.2, 2.4 Hz, 1H), 2.43 (ddd, *J* = 13.3, 10.8, 8.5 Hz, 1H), 2.08 (dd, *J* = 13.4, 4.6 Hz, 1H), 1.91 (d, *J* = 11.9 Hz, 1H); <sup>13</sup>C NMR (75 MHz, CDCl<sub>3</sub>) δ 203.3, 175.4, 158.9, 130.1, 128.0, 127.4, 125.8, 124.2, 120.9, 113.8, 67.2, 66.1, 60.0, 58.5, 56.0, 55.3, 35.6; IR (film)  $\nu_{\max}$  3295, 2957, 2942, 2850, 1740, 1720, 1601, 1475, 1442, 1300, 1219, 1197, 1128, 1045, 780; HRMS (ESI) calcd for C<sub>19</sub>H<sub>19</sub>NO<sub>4</sub> [M + Na]<sup>+</sup> 348.1206, found 348.1211.

**9-(2-Fluorophenyl)-4',5'-dihydro-2'H-8-azaspiro[bicyclo[4.3.1]deca[2,4]diene-7,3'-furan]-2',10-dione (3g)**

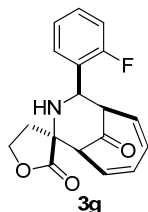

Prepared according to the general procedure as described above in 51% yield. Reaction time = 16 h. It was purified by flash chromatography ( EtOAc/PE = 1/10 ) to afford orange semi-solid. <sup>1</sup>H NMR analysis: >20:1 dr. <sup>1</sup>H NMR (300 MHz, CDCl<sub>3</sub>) δ 7.32 – 7.22 (m, 1H), 7.17 – 7.01 (m, 3H), 6.18 (dd, *J* = 11.4, 7.7 Hz, 1H), 6.02 (dd, *J* = 11.5, 7.7 Hz, 1H), 5.60 (dd, *J* = 11.4, 8.2 Hz, 1H), 5.15 – 4.98 (m, 2H), 4.53 (ddd, *J* = 10.8, 8.8, 5.6 Hz, 1H), 4.39 (m, 1H), 3.82 – 3.74 (m, 1H), 3.38 (dd, *J* = 8.2, 2.3 Hz, 1H), 2.43 (ddd, *J* = 13.3, 10.8, 8.5 Hz, 1H), 2.22 – 2.06 (m, 2H); <sup>13</sup>C NMR (75 MHz, CDCl<sub>3</sub>) δ 202.7, 175.2, 160.0 (d, *J* = 245.3 Hz), 129.0 (d, *J* = 9.0 Hz), 128.1, 127.7 (d, *J* = 3.8 Hz), 126.2, 125.2 (d, *J* = 12.8 Hz), 124.0, 123.9, 121.0, 115.7 (d, *J* = 21.8 Hz), 67.1, 66.2, 56.8, 56.8, 56.1, 35.8; IR (film)  $\nu_{\max}$  3325, 2927, 2867, 1780, 1500, 1457, 1400, 1219, 1196, 1110, 1028, 876, 705, 667; HRMS (ESI) calcd for C<sub>18</sub>H<sub>16</sub>FNO<sub>3</sub> [M + Na]<sup>+</sup> 336.1006, found 336.1010.

**9-(4-Fluorophenyl)-4',5'-dihydro-2'H-8-azaspiro[bicyclo[4.3.1]deca[2,4]diene-7,3'-furan]-2',10-dione (3h)**

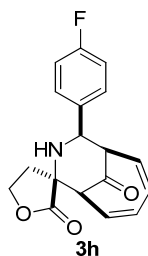

Prepared according to the general procedure as described above in 74% yield. Reaction time = 12 h. It was purified by flash chromatography ( EtOAc/PE = 1/10 ) to afford orange semi-solid. <sup>1</sup>H NMR analysis: >20:1 dr. <sup>1</sup>H NMR (300 MHz, CDCl<sub>3</sub>) δ 7.21 (m, 2H), 7.11 – 7.01 (m, 2H), 6.18 (dd, *J* = 11.4, 7.6 Hz, 1H), 6.03 (dd, *J* = 11.5, 7.7 Hz, 1H), 5.62 (dd, *J* = 11.4, 8.2 Hz, 1H), 5.10 (dd, *J* = 11.5, 7.7 Hz, 1H), 4.82 (d, *J* = 7.0 Hz, 1H), 4.55 (ddd, *J* = 9.8, 8.4, 5.2 Hz, 1H), 4.41 (ddd, *J* = 12.0, 6.6, 2.3 Hz, 1H), 3.75 – 3.67 (m, 1H), 3.38 (dd, *J* = 8.2, 2.3 Hz, 1H), 2.46 (ddd, *J* = 13.3, 10.7, 8.5 Hz, 1H), 2.16 – 2.05 (m, 1H), 1.93 (d, *J* = 11.3 Hz, 1H); <sup>13</sup>C NMR (75 MHz, CDCl<sub>3</sub>) δ 202.9, 175.3, 162.0 (d, *J* = 244.5 Hz), 133.8 (d, *J* = 3.0 Hz), 128.0, 127.9, 127.8, 126.1, 123.8, 121.1, 113.4 (d, *J* = 75 Hz), 67.1, 66.1, 59.8, 58.2, 55.9, 35.6; IR (film)  $\nu_{\max}$  3500, 2930, 1800, 1720, 1612, 1526, 1463, 1383, 1259, 1195, 1167, 1100, 1035, 850, 802, 765, 700, 660, 541, 525; HRMS (ESI) calcd for C<sub>18</sub>H<sub>16</sub>FNO<sub>3</sub> [M + Na]<sup>+</sup> 336.1006, found 336.1003.

**9-(4-Chlorophenyl)-4',5'-dihydro-2'H-8-azaspiro[bicyclo[4.3.1]deca[2,4]diene-7,3'-furan]-2',10-dione (3i)**

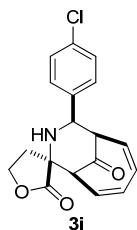

Prepared according to the general procedure as described above in 76% yield. Reaction time = 12 h. It was purified by flash chromatography ( EtOAc/PE = 1/10 ) to afford orange semi-solid. <sup>1</sup>H NMR analysis: >20:1 dr. <sup>1</sup>H NMR (300 MHz, CDCl<sub>3</sub>) δ 7.37 – 7.31 (m, 2H), 7.22 – 7.14 (m, 2H), 6.17 (dd, *J* = 11.4, 7.7 Hz, 1H), 6.02 (dd, *J* = 11.5, 7.7 Hz, 1H), 5.61 (dd, *J* = 11.3, 8.2 Hz, 1H), 5.14 – 5.02 (m, 1H), 4.82 (dd, *J* = 11.4, 3.9 Hz, 1H), 4.55 (ddd, *J* = 10.7, 8.9, 5.6 Hz, 1H), 4.41 (tt, *J* = 4.6, 2.3 Hz, 1H), 3.77 – 3.65 (m, 1H), 3.37 (dd, *J* = 8.2, 2.3 Hz, 1H), 2.45 (ddd, *J* = 13.4, 10.7, 8.5 Hz, 1H), 2.12 (ddd, *J* = 13.4, 5.6, 1.2 Hz, 1H), 1.93 (d, *J* = 11.6 Hz, 1H); <sup>13</sup>C NMR (75 MHz, CDCl<sub>3</sub>) δ 202.8, 175.3, 136.6, 133.3, 128.6, 128.0, 127.6, 126.2, 123.6, 121.1, 67.1, 66.2, 59.8, 58.0, 55.9, 35.5; IR (film)  $\nu_{\max}$  3502, 2930, 1715, 1647, 1500, 1397, 1276, 1210, 1195, 1093, 851, 744, 697, 678, 483; HRMS (ESI) calcd for C<sub>18</sub>H<sub>16</sub>ClNO<sub>3</sub> [M + Na]<sup>+</sup> 352.0711, found 352.0705.

**9-(4-Bromophenyl)-4',5'-dihydro-2'H-8-azaspiro[bicyclo[4.3.1]deca[2,4]diene-7,3'-furan]-2',10-dione (3j)**

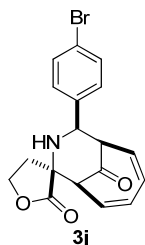

Prepared according to the general procedure as described above in 61% yield. Reaction time = 16 h. It was purified by flash chromatography ( EtOAc/PE = 1/10 ) to afford orange semi-solid. <sup>1</sup>H NMR analysis: >20:1 dr. <sup>1</sup>H NMR (300 MHz, CDCl<sub>3</sub>) δ 7.55 – 7.45 (m, 2H), 7.12 (d, *J* = 8.4 Hz, 2H), 6.17 (dd, *J* = 11.4, 7.7 Hz, 1H), 6.07 – 5.95 (m, 1H), 5.61 (dd, *J* = 11.4, 8.2 Hz, 1H), 5.09 (dd, *J* = 11.5, 7.7 Hz, 1H), 4.80 (dd, *J* = 11.5, 4.0 Hz, 1H), 4.64 – 4.49 (m, 1H), 4.41 (tt, *J* = 8.9, 4.4 Hz, 1H), 3.74 – 3.66 (m, 1H), 3.38 (dd, *J* = 8.2, 2.3 Hz, 1H), 2.53 – 2.33 (m, 1H), 2.11 (ddd, *J* = 12.0, 6.0, 4.9 Hz, 1H), 1.93 (d, *J* = 11.7 Hz, 1H); <sup>13</sup>C NMR (75 MHz, CDCl<sub>3</sub>) δ 202.7, 175.3, 137.1, 131.6, 128.0, 127.8, 126.2, 123.6, 121.4, 121.1, 67.1, 66.2, 59.9, 57.9, 55.9, 35.5; IR (film)  $\nu_{\max}$  3321, 2896, 2851, 1840, 1703, 1500, 1468, 1320, 1274, 1198, 1088, 1029, 894, 827, 776, 689, 656, 477; HRMS (ESI) calcd for C<sub>18</sub>H<sub>16</sub>BrNO<sub>3</sub> [M + Na]<sup>+</sup> 396.0206, found 396.0203.

**9-(Naphthalen-1-yl)-4',5'-dihydro-2'H-8-azaspiro[bicyclo[4.3.1]deca[2,4]diene-7,3'-furan]-2',10-dione (3k)**

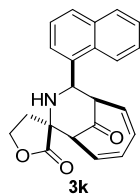

Prepared according to the general procedure as described above in 67% yield. Reaction time = 12 h. It was purified by flash chromatography ( EtOAc/PE = 1/10 ) to afford yellow semi-solid. <sup>1</sup>H NMR analysis: >20:1 dr. <sup>1</sup>H NMR (300 MHz, CDCl<sub>3</sub>) δ 8.06 (d, *J* = 8.4 Hz, 1H), 7.93 – 7.87 (m, 1H), 7.82 (d, *J* = 8.2 Hz, 1H), 7.57 (m, 2H), 7.49 – 7.41 (m, 1H), 7.21 (d, *J* = 7.2 Hz, 1H), 6.22 (dd, *J* = 11.4, 7.7 Hz, 1H), 6.08 – 5.95 (m, 1H), 5.75 – 5.59 (m, 2H), 4.84 (dd, *J* = 11.4, 7.8 Hz, 1H), 4.55 (ddd, *J* = 10.7, 8.9, 5.7 Hz, 1H), 4.42 (m, 1H), 3.91 (tt, *J* = 7.2, 3.5 Hz, 1H), 3.46 (dd, *J* = 8.2, 2.3 Hz, 1H), 2.57 – 2.41 (m, 1H), 2.31 – 2.14 (m, 2H); <sup>13</sup>C NMR (75 MHz, CDCl<sub>3</sub>) δ 203.3, 175.6, 133.8, 133.4, 129.9, 128.90, 128.2, 128.1, 126.8, 125.9, 125.6, 124.6, 124.2, 123.3, 122.6, 121.0, 67.3, 66.1, 57.3, 56.2, 35.6, 30.0; IR (film)  $\nu_{\max}$  3300, 2975, 1845, 1732, 1645, 1425, 1331, 1261, 1161, 1030, 955, 836, 705, 6783, 658,442; HRMS (ESI) calcd for C<sub>22</sub>H<sub>19</sub>NO<sub>3</sub> [M + Na]<sup>+</sup> 368.1257, found 368.1252.





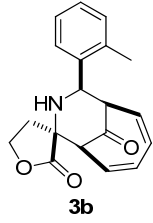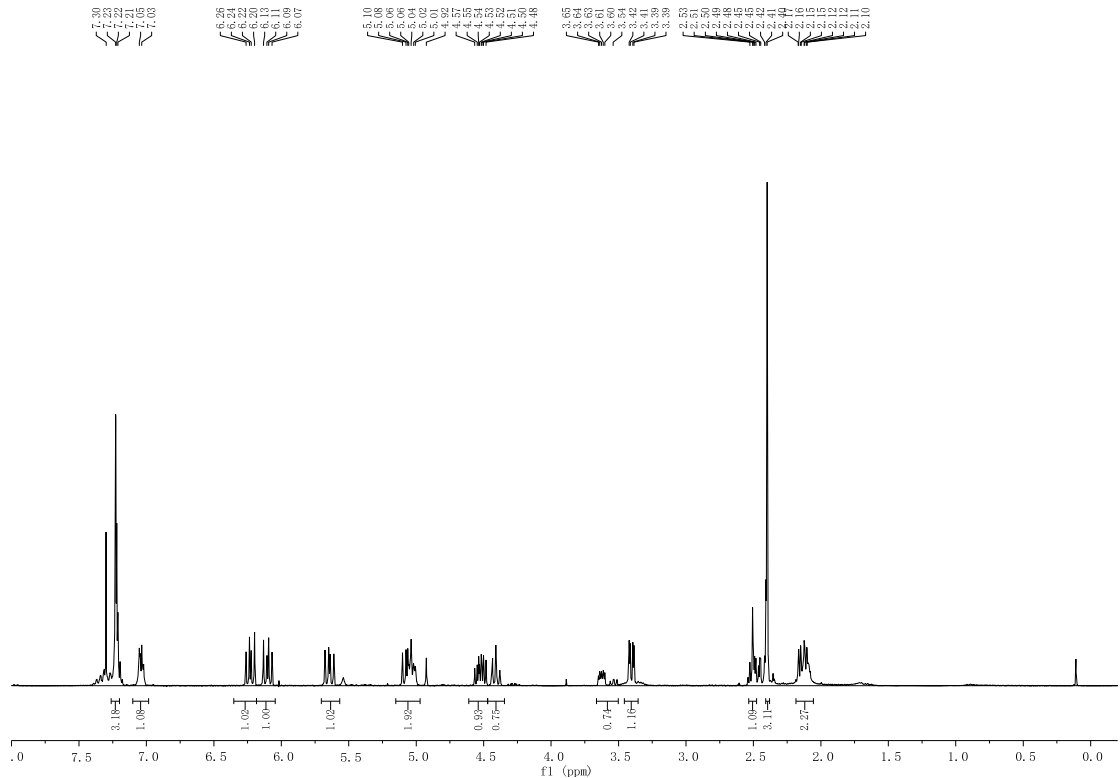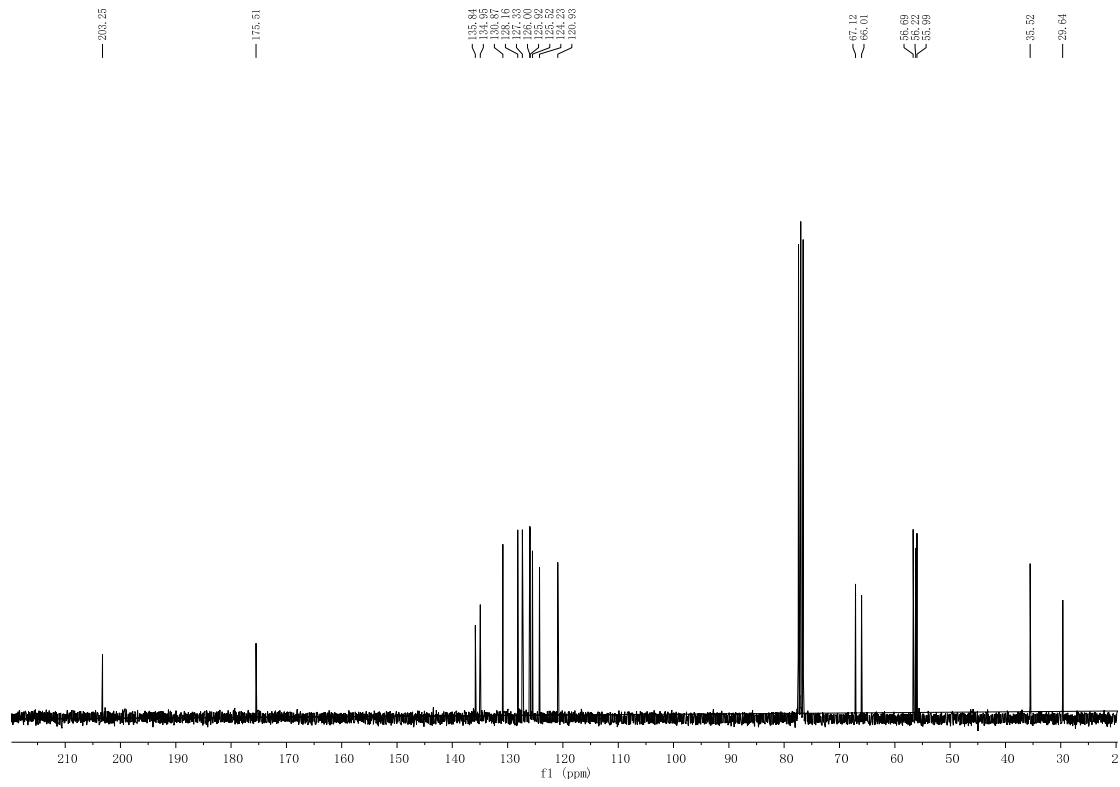

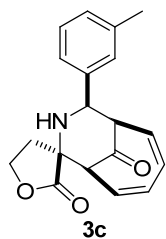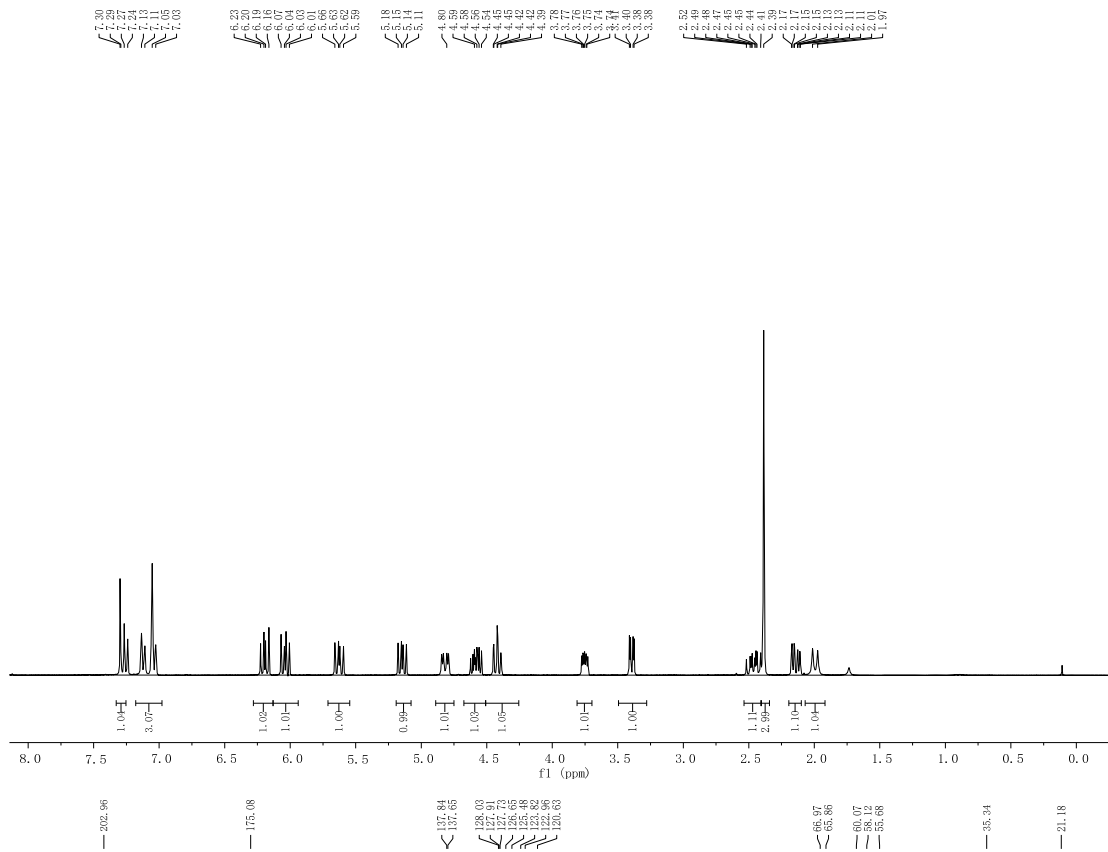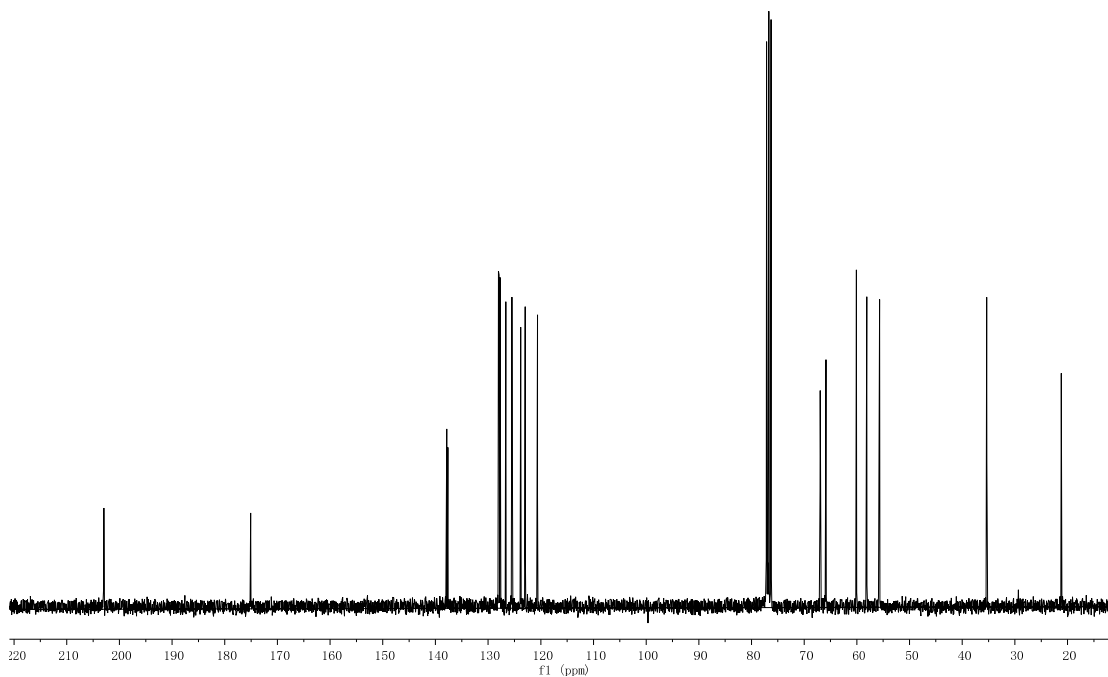

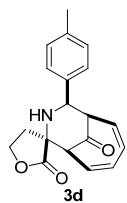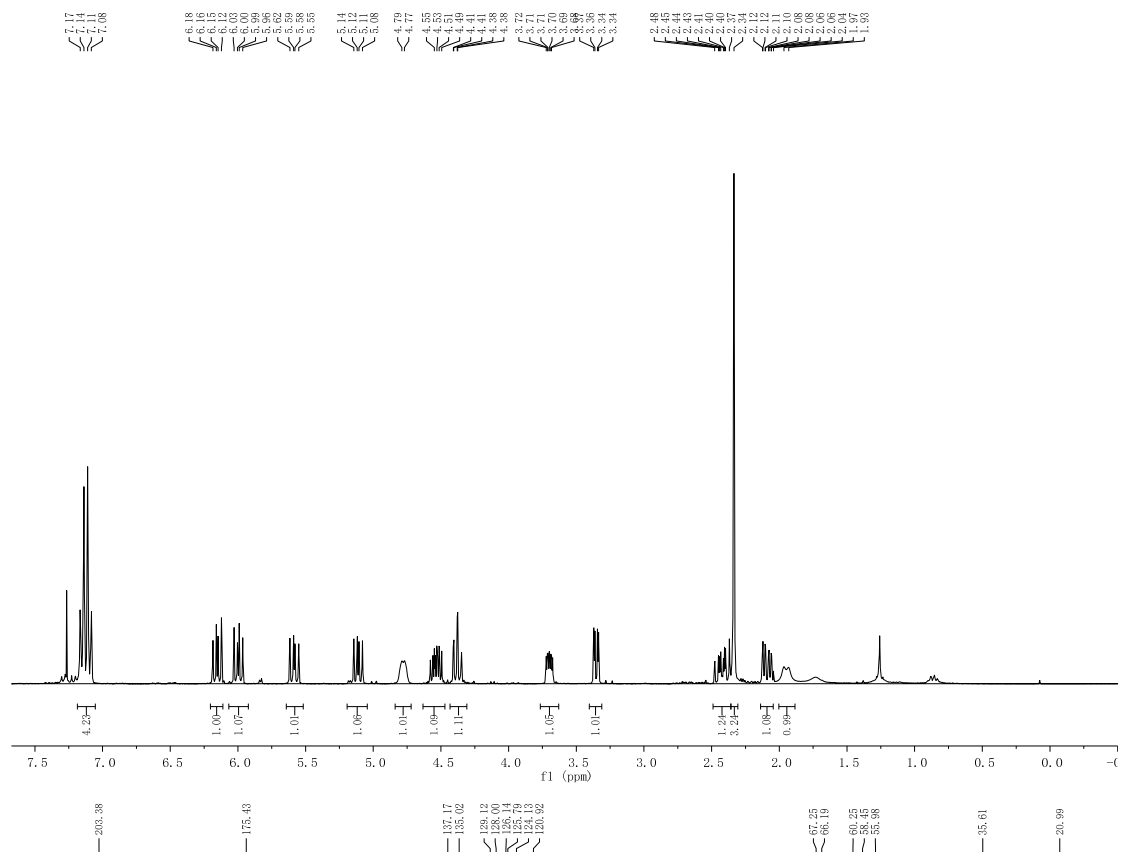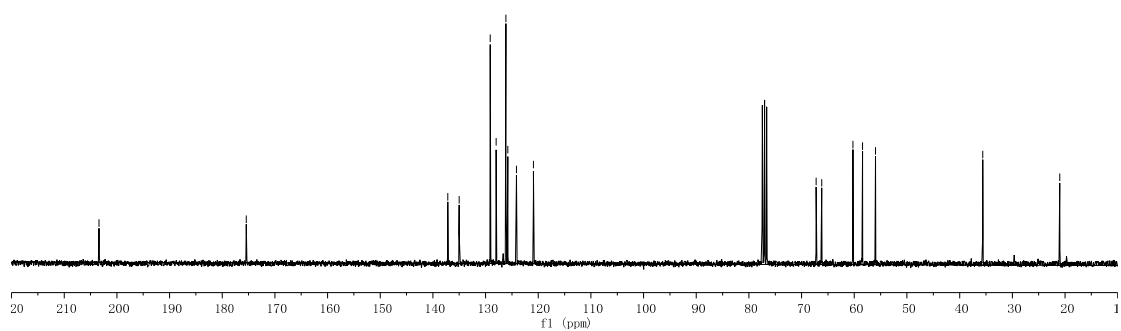

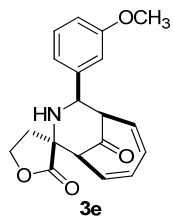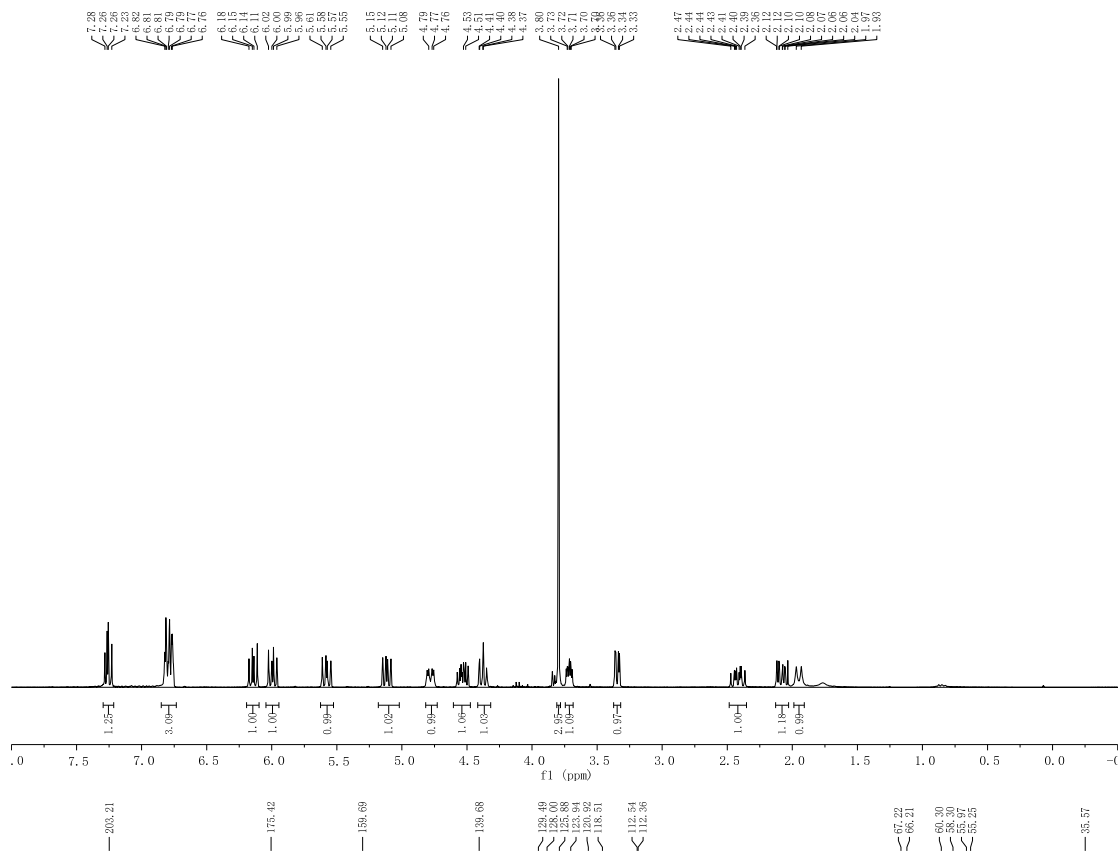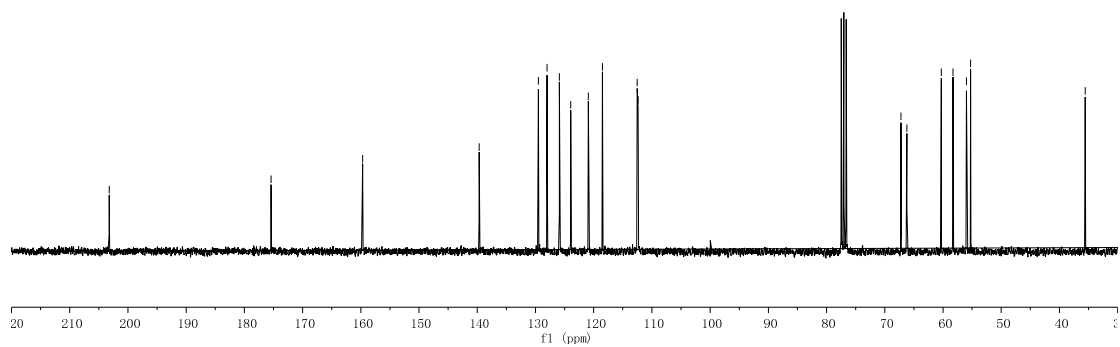

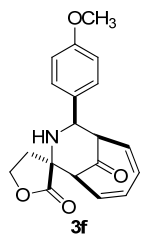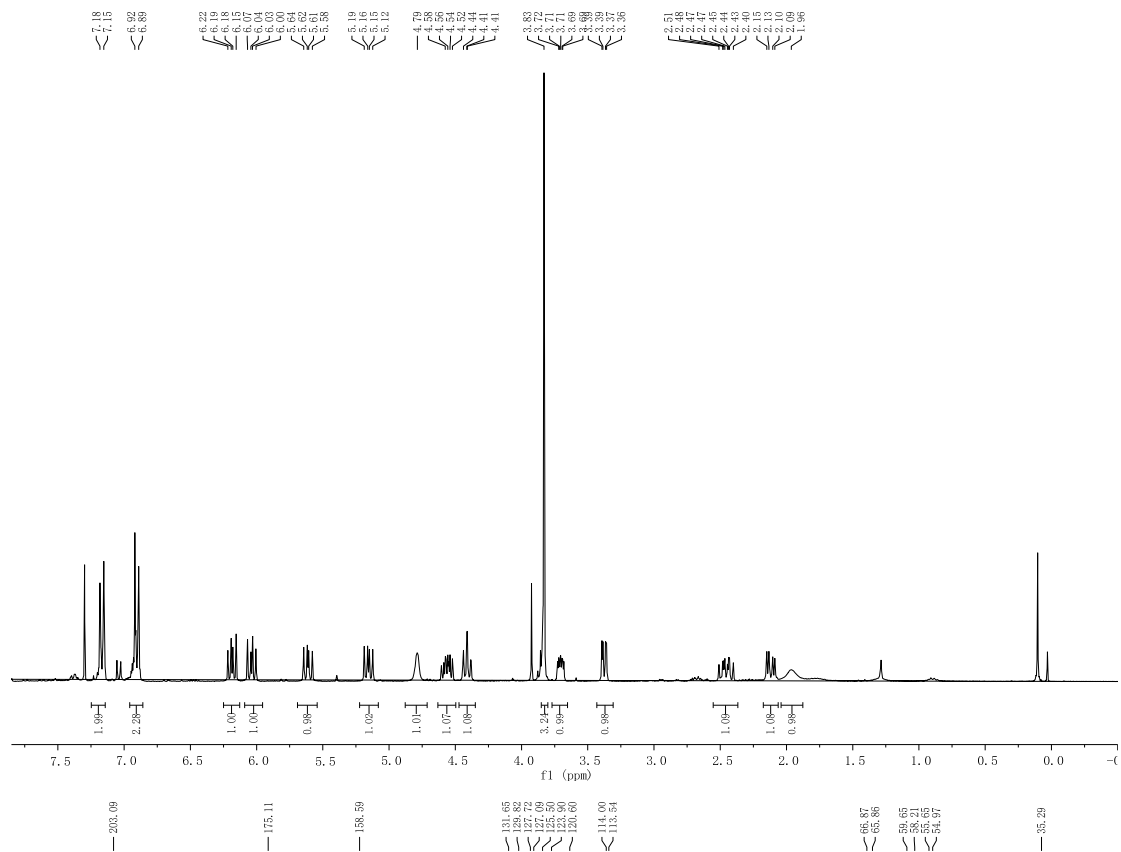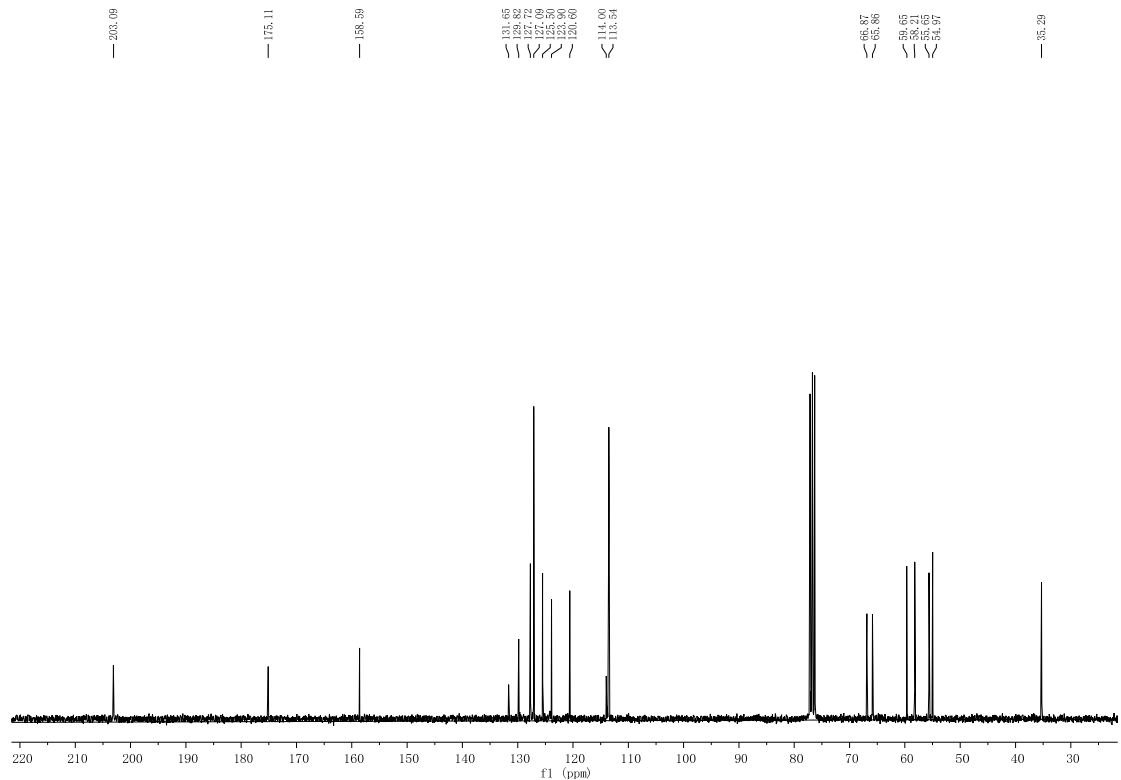

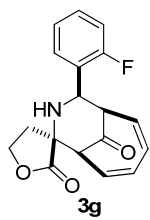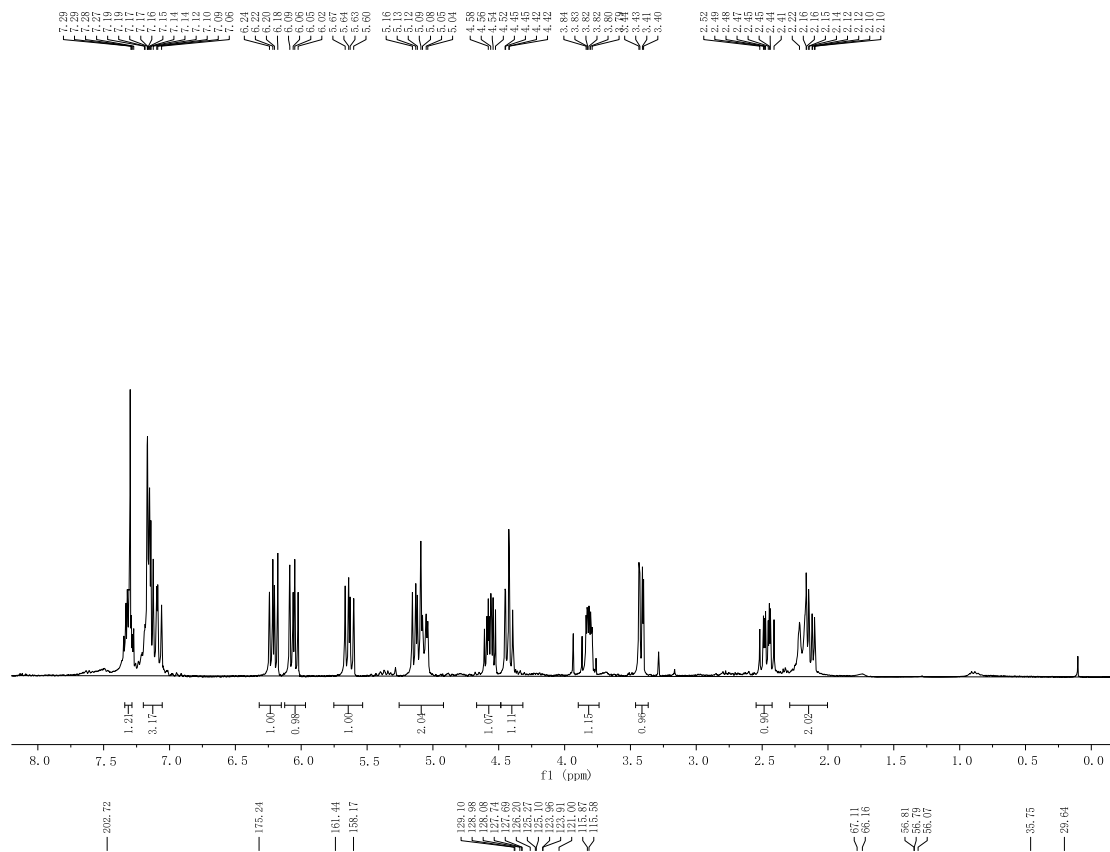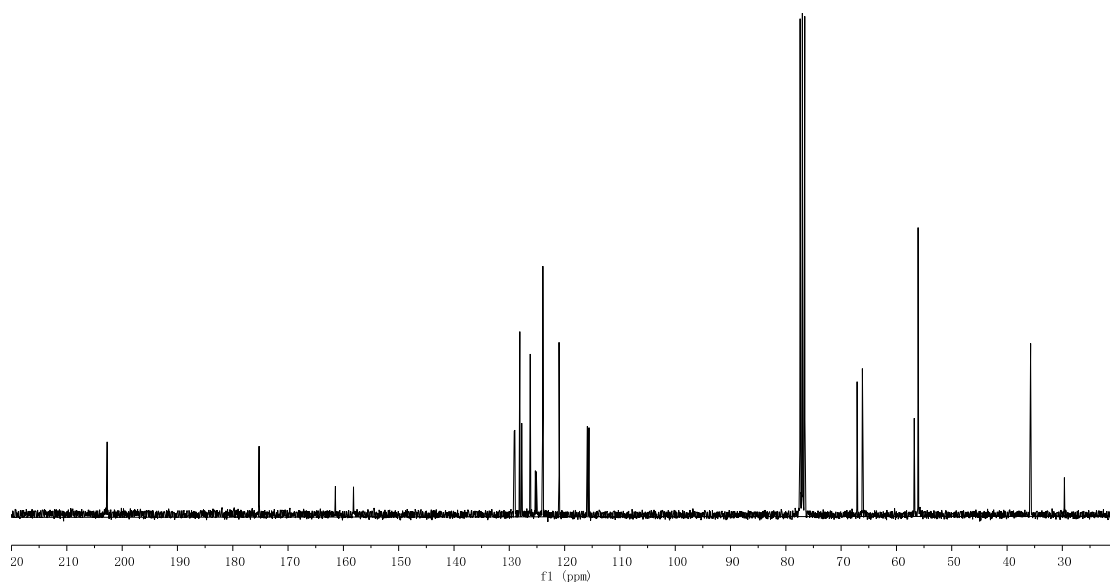

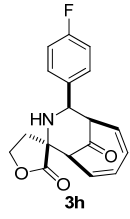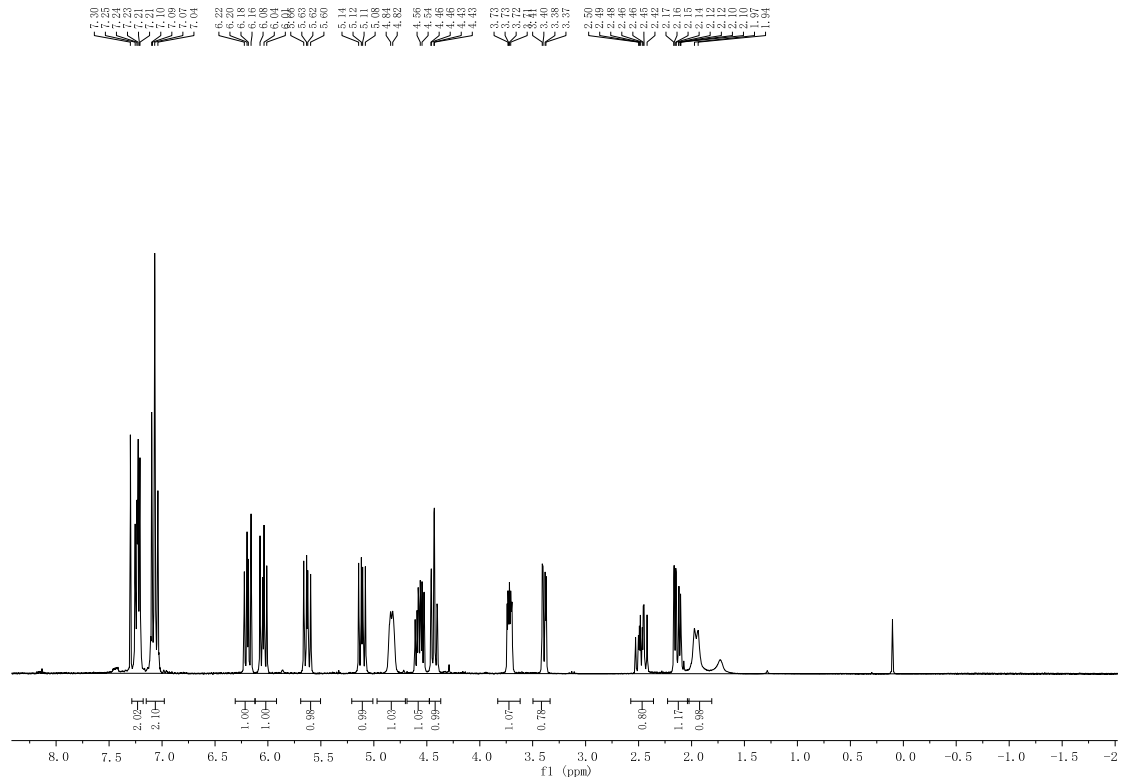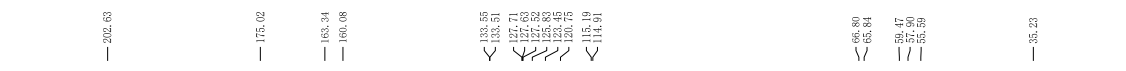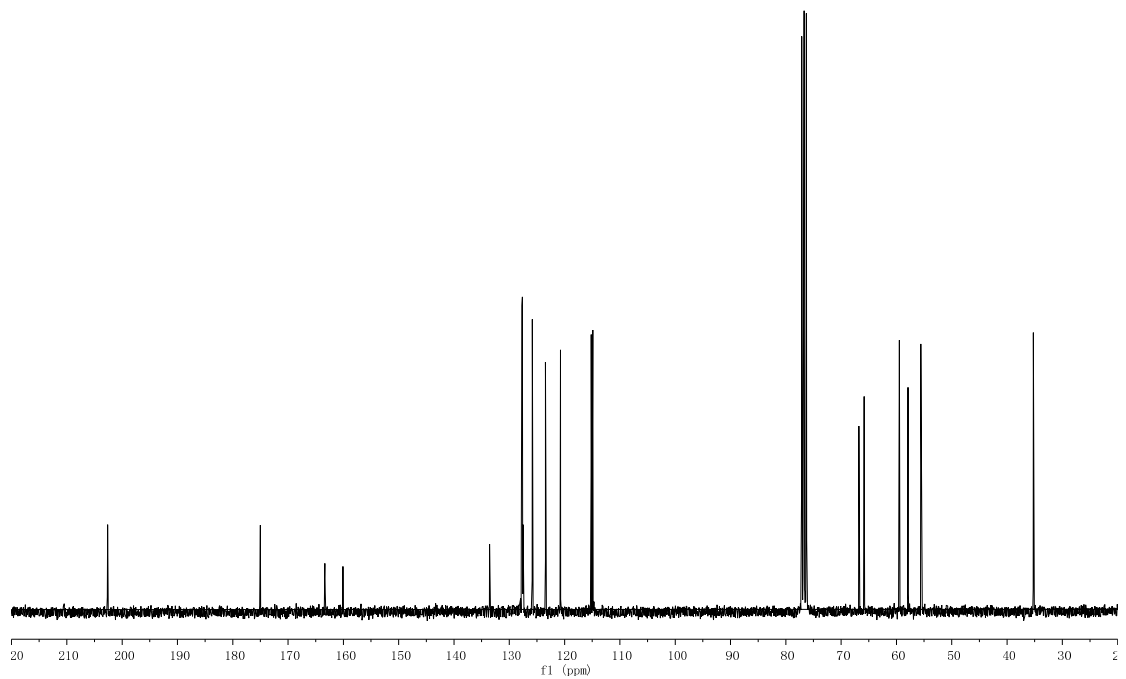



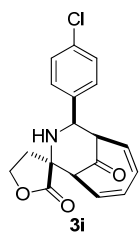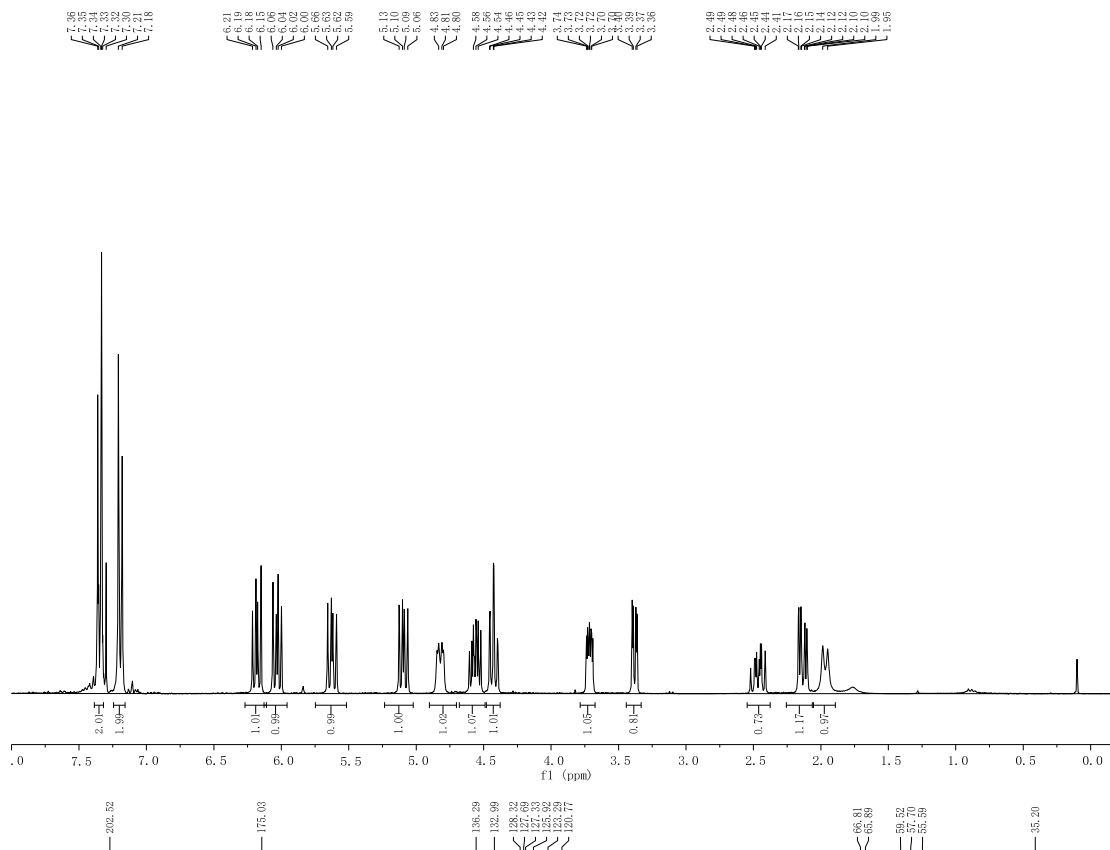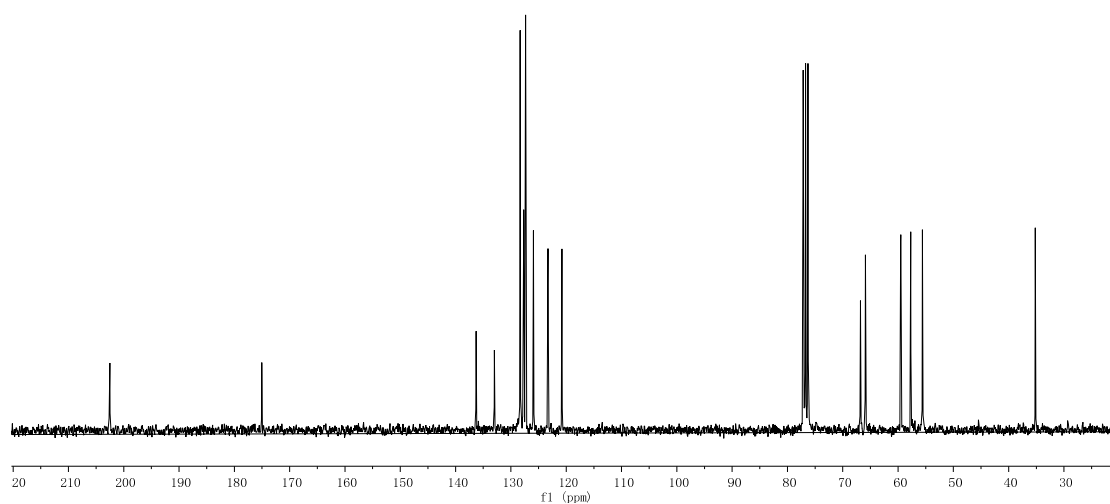



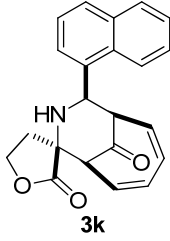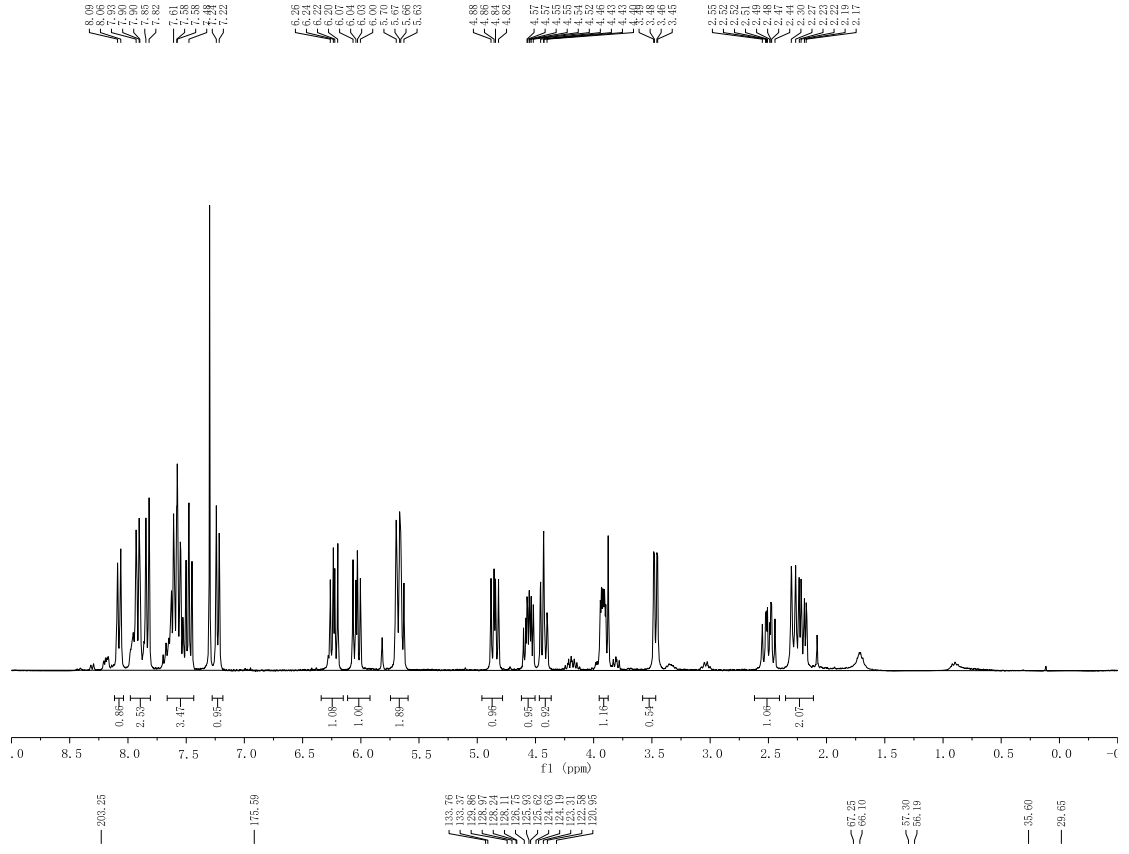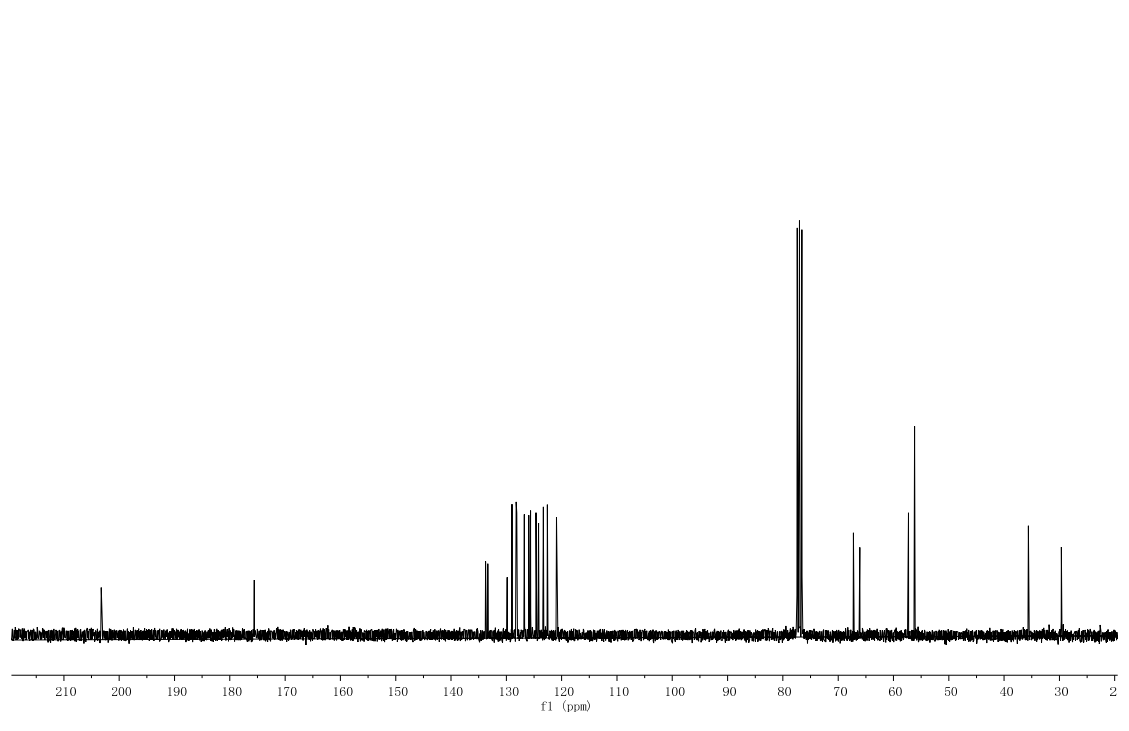

### X-Ray Crystallographic Data of 3a

Crystallographic data for **3a** have been deposited with the Cambridge Crystallographic Data Centre as supplementary numbers CCDC 1473250. These data can be obtained free of charge via [www.ccdc.cam.ac.uk/data\\_request/cif](http://www.ccdc.cam.ac.uk/data_request/cif), or by emailing [data\\_request@ccdc.cam.ac.uk](mailto:data_request@ccdc.cam.ac.uk), or by contacting The Cambridge Crystallographic Data Centre, 12, Union Road, Cambridge CB2 1EZ, UK; fax: +44 1223 336033.

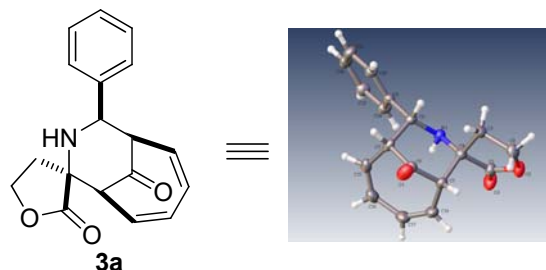

Table 1. Crystal data and structure refinement for **3a**.

|                                   |                                                                            |
|-----------------------------------|----------------------------------------------------------------------------|
| Identification code               | <b>3a</b>                                                                  |
| Empirical formula                 | C <sub>18</sub> H <sub>17</sub> N O <sub>3</sub>                           |
| Formula weight                    | 295.32                                                                     |
| Temperature                       | 173.1500 K                                                                 |
| Wavelength                        | 0.71073 Å                                                                  |
| Crystal system                    | Orthorhombic                                                               |
| Space group                       | P b c a                                                                    |
| Unit cell dimensions              | a = 11.483(2) Å = 90°.<br>b = 10.012(2) Å = 90°.<br>c = 25.315(5) Å = 90°. |
| Volume                            | 2910.5(10) Å <sup>3</sup>                                                  |
| Z                                 | 8                                                                          |
| Density (calculated)              | 1.348 Mg/m <sup>3</sup>                                                    |
| Absorption coefficient            | 0.092 mm <sup>-1</sup>                                                     |
| F(000)                            | 1248                                                                       |
| Crystal size                      | 0.38 x 0.24 x 0.07 mm <sup>3</sup>                                         |
| Theta range for data collection   | 3.219 to 27.470°.                                                          |
| Index ranges                      | -14 ≤ h ≤ 14, -12 ≤ k ≤ 4, -31 ≤ l ≤ 32                                    |
| Reflections collected             | 11086                                                                      |
| Independent reflections           | 3307 [R(int) = 0.0382]                                                     |
| Completeness to theta = 26.000°   | 99.6 %                                                                     |
| Absorption correction             | Semi-empirical from equivalents                                            |
| Max. and min. transmission        | 1.0000 and 0.8165                                                          |
| Refinement method                 | Full-matrix least-squares on F <sup>2</sup>                                |
| Data / restraints / parameters    | 3307 / 0 / 203                                                             |
| Goodness-of-fit on F <sup>2</sup> | 1.217                                                                      |
| Final R indices [I > 2σ(I)]       | R1 = 0.0692, wR2 = 0.1149                                                  |
| R indices (all data)              | R1 = 0.0828, wR2 = 0.1199                                                  |
| Extinction coefficient            | n/a                                                                        |
| Largest diff. peak and hole       | 0.209 and -0.242 e.Å <sup>-3</sup>                                         |

Table 2. Atomic coordinates ( $\times 10^4$ ) and equivalent isotropic displacement parameters ( $\text{\AA}^2 \times 10^3$ ) for **3a**.  $U(\text{eq})$  is defined as one third of the trace of the orthogonalized  $U^{ij}$  tensor.

|     | x       | y        | z       | $U(\text{eq})$ |
|-----|---------|----------|---------|----------------|
| O1  | 4504(2) | -1248(2) | 4395(1) | 38(1)          |
| O2  | 6147(1) | -980(2)  | 2480(1) | 33(1)          |
| O3  | 5063(2) | 841(2)   | 2353(1) | 40(1)          |
| N1  | 5695(2) | 1608(2)  | 3398(1) | 23(1)          |
| C1  | 5558(2) | 102(2)   | 2651(1) | 27(1)          |
| C2  | 6738(2) | -1626(2) | 2922(1) | 32(1)          |
| C3  | 6744(2) | -578(2)  | 3359(1) | 29(1)          |
| C4  | 5629(2) | 208(2)   | 3250(1) | 23(1)          |
| C5  | 4551(2) | -529(2)  | 3501(1) | 24(1)          |
| C6  | 4596(2) | -313(2)  | 4092(1) | 25(1)          |
| C7  | 4763(2) | 1100(2)  | 4281(1) | 25(1)          |
| C8  | 5785(2) | 1786(2)  | 3970(1) | 22(1)          |
| C9  | 5888(2) | 3238(2)  | 4126(1) | 22(1)          |
| C10 | 6480(2) | 3566(2)  | 4590(1) | 27(1)          |
| C11 | 6566(2) | 4881(2)  | 4756(1) | 32(1)          |
| C12 | 6043(2) | 5892(2)  | 4467(1) | 31(1)          |
| C13 | 5446(2) | 5573(2)  | 4011(1) | 30(1)          |
| C14 | 5367(2) | 4262(2)  | 3841(1) | 27(1)          |
| C15 | 3652(2) | 1882(2)  | 4243(1) | 31(1)          |
| C16 | 2793(2) | 1755(2)  | 3893(1) | 35(1)          |
| C17 | 2689(2) | 853(3)   | 3444(1) | 38(1)          |
| C18 | 3410(2) | -94(2)   | 3271(1) | 33(1)          |

Table 3. Bond lengths [Å] and angles [°] for **3a**.

|          |            |
|----------|------------|
| O1-C6    | 1.215(2)   |
| O2-C1    | 1.348(2)   |
| O2-C2    | 1.461(3)   |
| O3-C1    | 1.200(2)   |
| N1-C4    | 1.453(2)   |
| N1-C8    | 1.462(2)   |
| C1-C4    | 1.523(3)   |
| C2-C3    | 1.524(3)   |
| C3-C4    | 1.528(3)   |
| C4-C5    | 1.574(3)   |
| C5-C6    | 1.515(3)   |
| C5-C18   | 1.498(3)   |
| C6-C7    | 1.506(3)   |
| C7-C8    | 1.571(3)   |
| C7-C15   | 1.499(3)   |
| C8-C9    | 1.511(3)   |
| C9-C10   | 1.395(3)   |
| C9-C14   | 1.390(3)   |
| C10-C11  | 1.385(3)   |
| C11-C12  | 1.386(3)   |
| C12-C13  | 1.381(3)   |
| C13-C14  | 1.384(3)   |
| C15-C16  | 1.333(3)   |
| C16-C17  | 1.456(3)   |
| C17-C18  | 1.333(3)   |
| C1-O2-C2 | 109.98(15) |
| C4-N1-C8 | 112.15(15) |
| O2-C1-C4 | 110.47(17) |
| O3-C1-O2 | 122.08(18) |
| O3-C1-C4 | 127.46(19) |
| O2-C2-C3 | 104.68(16) |

|             |            |
|-------------|------------|
| C2-C3-C4    | 102.70(17) |
| N1-C4-C1    | 109.11(16) |
| N1-C4-C3    | 113.94(17) |
| N1-C4-C5    | 112.90(16) |
| C1-C4-C3    | 100.84(16) |
| C1-C4-C5    | 109.10(16) |
| C3-C4-C5    | 110.20(16) |
| C6-C5-C4    | 107.80(15) |
| C18-C5-C4   | 113.25(17) |
| C18-C5-C6   | 111.84(17) |
| O1-C6-C5    | 120.77(18) |
| O1-C6-C7    | 122.33(18) |
| C7-C6-C5    | 116.89(17) |
| C6-C7-C8    | 110.25(16) |
| C15-C7-C6   | 111.18(17) |
| C15-C7-C8   | 112.06(16) |
| N1-C8-C7    | 112.98(16) |
| N1-C8-C9    | 112.44(16) |
| C9-C8-C7    | 110.32(16) |
| C10-C9-C8   | 119.00(17) |
| C14-C9-C8   | 122.68(18) |
| C14-C9-C10  | 118.24(18) |
| C11-C10-C9  | 120.95(19) |
| C10-C11-C12 | 120.2(2)   |
| C13-C12-C11 | 119.2(2)   |
| C12-C13-C14 | 120.8(2)   |
| C13-C14-C9  | 120.63(19) |
| C16-C15-C7  | 128.5(2)   |
| C15-C16-C17 | 129.7(2)   |
| C18-C17-C16 | 130.3(2)   |
| C17-C18-C5  | 128.5(2)   |

---

Symmetry transformations used to generate equivalent atoms:

Table 4. Anisotropic displacement parameters ( $\text{\AA}^2 \times 10^3$ ) for **3a**. The anisotropic displacement factor exponent takes the form:  $-2 \sum_{h k l} [h^2 a^{*2} U^{11} + \dots + 2 h k a^* b^* U^{12}]$

|     | U <sup>11</sup> | U <sup>22</sup> | U <sup>33</sup> | U <sup>23</sup> | U <sup>13</sup> | U <sup>12</sup> |
|-----|-----------------|-----------------|-----------------|-----------------|-----------------|-----------------|
| O1  | 58(1)           | 28(1)           | 30(1)           | 6(1)            | -3(1)           | -9(1)           |
| O2  | 41(1)           | 32(1)           | 26(1)           | -2(1)           | 4(1)            | 9(1)            |
| O3  | 53(1)           | 43(1)           | 24(1)           | 2(1)            | -2(1)           | 17(1)           |
| N1  | 26(1)           | 22(1)           | 22(1)           | 1(1)            | -1(1)           | 0(1)            |
| C1  | 29(1)           | 28(1)           | 25(1)           | -2(1)           | 2(1)            | 3(1)            |
| C2  | 33(1)           | 29(1)           | 36(1)           | 0(1)            | 2(1)            | 8(1)            |
| C3  | 23(1)           | 29(1)           | 34(1)           | 0(1)            | -2(1)           | 3(1)            |
| C4  | 24(1)           | 23(1)           | 22(1)           | 0(1)            | -1(1)           | 1(1)            |
| C5  | 25(1)           | 23(1)           | 24(1)           | -3(1)           | -2(1)           | -3(1)           |
| C6  | 26(1)           | 25(1)           | 24(1)           | 2(1)            | 0(1)            | -2(1)           |
| C7  | 34(1)           | 24(1)           | 18(1)           | 0(1)            | -1(1)           | -5(1)           |
| C8  | 24(1)           | 22(1)           | 22(1)           | 0(1)            | -4(1)           | 1(1)            |
| C9  | 19(1)           | 22(1)           | 24(1)           | 1(1)            | 1(1)            | -3(1)           |
| C10 | 28(1)           | 25(1)           | 27(1)           | 2(1)            | -4(1)           | 1(1)            |
| C11 | 34(1)           | 34(1)           | 29(1)           | -6(1)           | -6(1)           | -3(1)           |
| C12 | 34(1)           | 23(1)           | 36(1)           | -6(1)           | 2(1)            | -3(1)           |
| C13 | 31(1)           | 24(1)           | 35(1)           | 4(1)            | -3(1)           | 1(1)            |
| C14 | 29(1)           | 24(1)           | 29(1)           | 2(1)            | -5(1)           | -2(1)           |
| C15 | 34(1)           | 27(1)           | 31(1)           | -5(1)           | 12(1)           | -4(1)           |
| C16 | 24(1)           | 34(1)           | 48(1)           | -4(1)           | 7(1)            | 3(1)            |
| C17 | 24(1)           | 52(2)           | 38(1)           | -4(1)           | -6(1)           | 2(1)            |
| C18 | 26(1)           | 45(1)           | 29(1)           | -7(1)           | -5(1)           | -3(1)           |

Table 5. Hydrogen coordinates ( $\times 10^4$ ) and isotropic displacement parameters ( $\text{\AA}^2 \times 10^3$ ) for **3a**.

|     | x    | y     | z    | U(eq) |
|-----|------|-------|------|-------|
| H2A | 7526 | -1876 | 2826 | 39    |
| H2B | 6319 | -2419 | 3034 | 39    |
| H3A | 7425 | -8    | 3334 | 35    |
| H3B | 6724 | -990  | 3705 | 35    |
| H5  | 4640 | -1487 | 3433 | 29    |



|     |          |          |         |       |
|-----|----------|----------|---------|-------|
| H7  | 4986     | 1064     | 4655    | 30    |
| H8  | 6506     | 1346     | 4082    | 27    |
| H10 | 6823     | 2893     | 4789    | 32    |
| H11 | 6975     | 5085     | 5063    | 39    |
| H12 | 6094     | 6775     | 4580    | 37    |
| H13 | 5093     | 6247     | 3816    | 36    |
| H14 | 4962     | 4065     | 3533    | 33    |
| H15 | 3549     | 2542     | 4497    | 37    |
| H16 | 2165     | 2328     | 3943    | 43    |
| H17 | 2012     | 955      | 3247    | 46    |
| H18 | 3174     | -544     | 2968    | 40    |
| H1  | 5070(20) | 2030(20) | 3263(9) | 43(7) |

Table 6. Torsion angles [°] for **3a**.

|              |             |
|--------------|-------------|
| O1-C6-C7-C8  | 132.2(2)    |
| O1-C6-C7-C15 | -102.9(2)   |
| O2-C1-C4-N1  | 144.11(17)  |
| O2-C1-C4-C3  | 23.9(2)     |
| O2-C1-C4-C5  | -92.1(2)    |
| O2-C2-C3-C4  | 30.8(2)     |
| O3-C1-C4-N1  | -36.0(3)    |
| O3-C1-C4-C3  | -156.2(2)   |
| O3-C1-C4-C5  | 87.8(3)     |
| N1-C4-C5-C6  | -54.1(2)    |
| N1-C4-C5-C18 | 70.1(2)     |
| N1-C8-C9-C10 | -151.47(18) |
| N1-C8-C9-C14 | 31.7(3)     |
| C1-O2-C2-C3  | -16.7(2)    |
| C1-C4-C5-C6  | -175.63(16) |
| C1-C4-C5-C18 | -51.4(2)    |
| C2-O2-C1-O3  | 175.3(2)    |
| C2-O2-C1-C4  | -4.8(2)     |
| C2-C3-C4-N1  | -148.81(17) |
| C2-C3-C4-C1  | -32.1(2)    |
| C2-C3-C4-C5  | 83.10(19)   |
| C3-C4-C5-C6  | 74.5(2)     |
| C3-C4-C5-C18 | -161.20(17) |
| C4-N1-C8-C7  | -55.9(2)    |

|                 |             |
|-----------------|-------------|
| C4-N1-C8-C9     | 178.42(16)  |
| C4-C5-C6-O1     | -130.2(2)   |
| C4-C5-C6-C7     | 49.6(2)     |
| C4-C5-C18-C17   | -93.3(3)    |
| C5-C6-C7-C8     | -47.5(2)    |
| C5-C6-C7-C15    | 77.4(2)     |
| C6-C5-C18-C17   | 28.7(3)     |
| C6-C7-C8-N1     | 48.4(2)     |
| C6-C7-C8-C9     | 175.25(16)  |
| C6-C7-C15-C16   | -31.7(3)    |
| C7-C8-C9-C10    | 81.4(2)     |
| C7-C8-C9-C14    | -95.4(2)    |
| C7-C15-C16-C17  | -1.4(4)     |
| C8-N1-C4-C1     | -179.04(16) |
| C8-N1-C4-C3     | -67.2(2)    |
| C8-N1-C4-C5     | 59.5(2)     |
| C8-C7-C15-C16   | 92.1(3)     |
| C8-C9-C10-C11   | -178.04(19) |
| C8-C9-C14-C13   | 177.37(19)  |
| C9-C10-C11-C12  | 1.1(3)      |
| C10-C9-C14-C13  | 0.6(3)      |
| C10-C11-C12-C13 | -0.5(3)     |
| C11-C12-C13-C14 | -0.1(3)     |
| C12-C13-C14-C9  | 0.0(3)      |
| C14-C9-C10-C11  | -1.1(3)     |
| C15-C7-C8-N1    | -76.0(2)    |
| C15-C7-C8-C9    | 50.9(2)     |
| C15-C16-C17-C18 | 1.4(4)      |
| C16-C17-C18-C5  | 1.3(4)      |
| C18-C5-C6-O1    | 104.7(2)    |
| C18-C5-C6-C7    | -75.5(2)    |

---

Symmetry transformations used to generate equivalent atoms:

Table 7. Hydrogen bonds for **3a** [Å and °].

---

| D-H...A | d(D-H) | d(H...A) | d(D...A) | <(DHA) |
|---------|--------|----------|----------|--------|
|---------|--------|----------|----------|--------|

---
